# Supplementary material for: Inducible Defenses Stay Up Late: Temporal Patterns of Immune Gene Expression in Tenebrio molitor
Source: PubMed Central journal article supplement (PMC4065263; doi:10.1534/g3.113.008516), 2014-06-01
Supplement: supp_g3.113.008516_008516SI.pdf [file supp_g3.113.008516_008516SI.pdf]

**Inducible defenses stay up late: temporal patterns of immune gene expression in *Tenebrio molitor***

Paul R Johnston, Olga Makarova, Jens Rolff

Evolutionary Biology, Institute for Biology, Free University Berlin, Berlin, Germany

Corresponding author: Paul R. Johnston. Evolutionary Biology, Institute for Biology, Free University Berlin, Koenigin-Luise-Strasse 1-3, 14195 Berlin, Germany. paul.johnston@fu-berlin.de Phone: +49(0)30 838 54692  
Fax: +49(0)30 838 54869

**DOI: 10.1534/g3.113.008516**

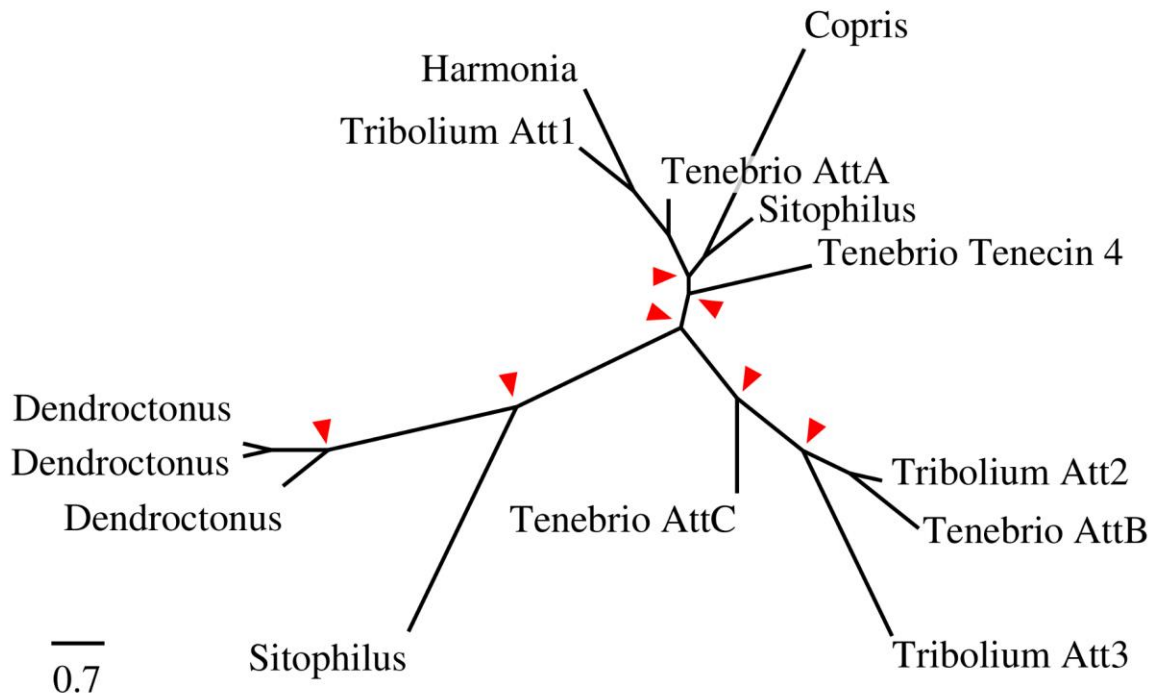

**Figure S1** Maximum likelihood phylogenetic tree showing relationships among beetle attacins. Protein sequences were aligned using MUSCLE and Gblocks. Trees were constructed using PhyML and TreeDyn using phylogeny.fr webserver. Red arrows indicate a confidence index > 0.8.

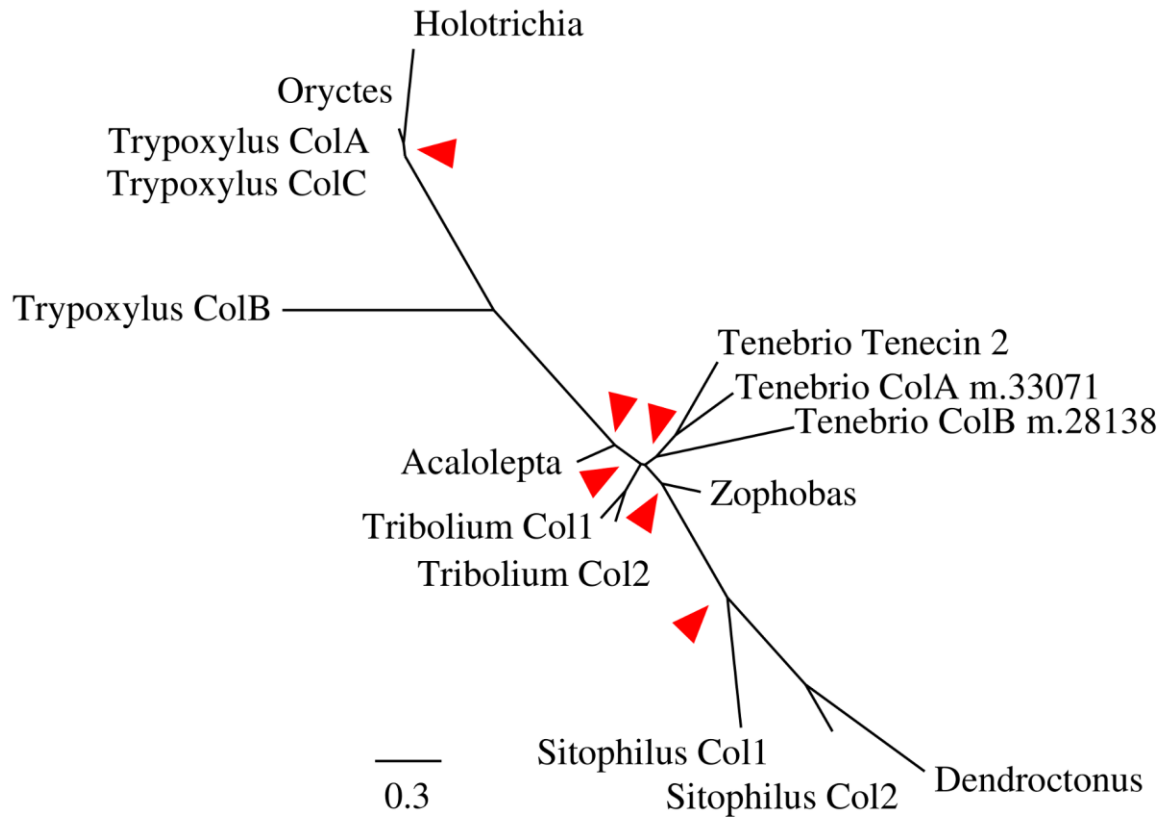

**Figure S2** Maximum likelihood phylogenetic tree showing relationships among beetle coleoptericins. Protein sequences were aligned using MUSCLE and Gblocks. Trees were constructed using PhyML and TreeDyn using phylogeny.fr webserver. Red arrows indicate a confidence index > 0.8.

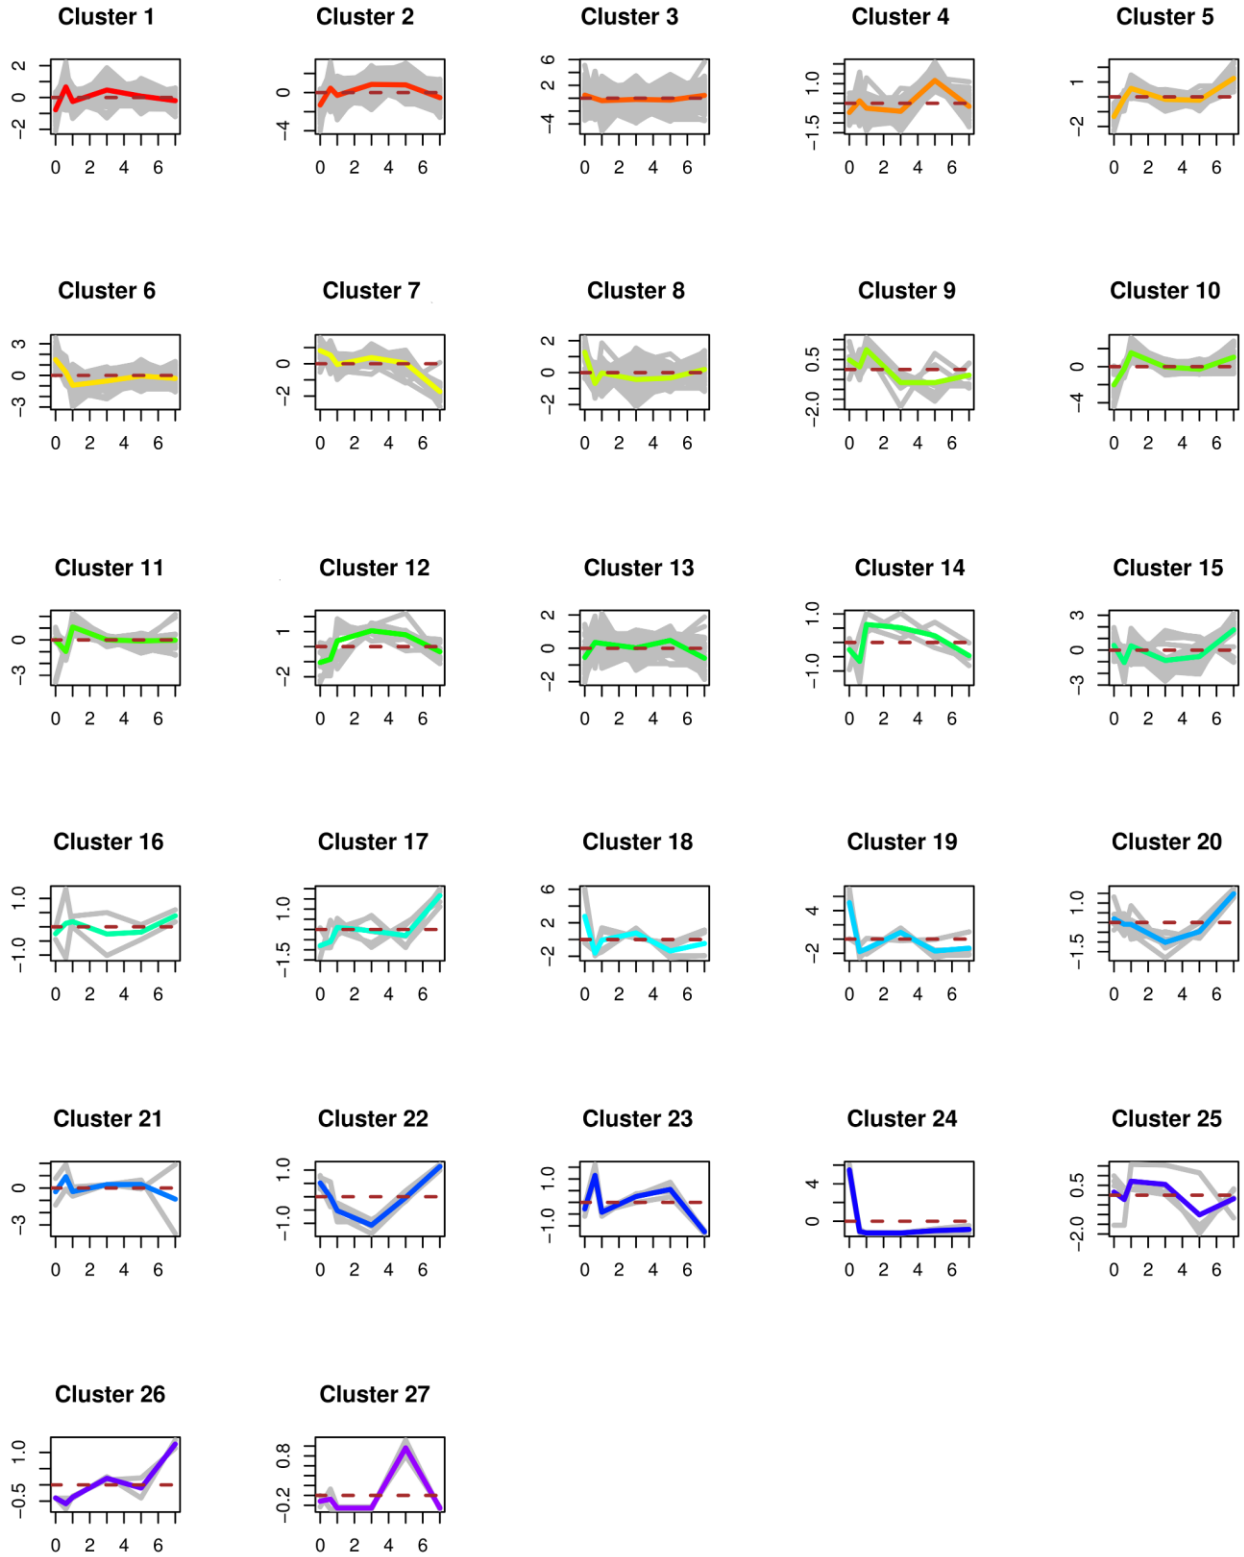

**Figure S3** Gene expression clusters produced by the R package DIRECT. Vertical axes represent median centered log<sub>2</sub> FPKM whereas horizontal axes represent days post immune challenge. Colored lines depict the median profile for each cluster.

### Files S1-S3

Available for download at <http://www.g3journal.org/lookup/suppl/doi:10.1534/g3.113.008516/-/DC1>.

**File S1** Full fasta format output of trinity reference assembly.

**File S2** Reference assembly after filtering to remove sequences representing less than 1% of the per-component expression across all mapped RNAseq reads.

**File S3** Full annotation report for 77,118 predicted peptides derived from the reference assembly.

**Table S1 Comparison of trinity assemblies utilising illumina and/or 454 reads.** sim PE, simulated paired-end; USCO, universal single-copy ortholog.

| Assembly                  | Components | Transcripts | N50  | N90 | Orthologs | USCOs |
|---------------------------|------------|-------------|------|-----|-----------|-------|
| Illumina                  | 44811      | 96330       | 2545 | 571 | 8955      | 3071  |
| 454 (newbler)*            | 16647*     | 22507       | 1567 | 559 | 7628      | 2907  |
| 454 sim PE                | 25649      | 58060       | 696  | 306 | 6557      | 2465  |
| Illumina + 454            | 45676      | 103597      | 2183 | 516 | 8830      | 2999  |
| Illumina + 454 sim PE     | 49410      | 122521      | 1745 | 448 | 9370      | 3120  |
| Illumina + 454 (newbler)* | 54099*     | 118322      | 742  | 168 | 9057      | 3107  |
| 454                       | 13724      | 25374       | 1097 | 434 | 6876      | 2646  |

\*assembly newbler included for reference. Newbler does not compute components and the number of isogroups is reported instead. Orthologs, the number of putative orthologs between the assembly and the *Tribolium castaneum* proteome. In each assembly Illumina data was first digitally normalized.

**Table S2 Summary statistics for each of the data sets used in *de novo* assembly.** sim PE, simulated paired-end; diginorm, digitally normalized.

| Data set          | Reads       | Mean length (bp) | File size (GB)     |
|-------------------|-------------|------------------|--------------------|
| 454               | 1,151,456   | 285              | 0.695 <sup>a</sup> |
| Illumina*         | 95,339,034  | 101              | 22.8 <sup>a</sup>  |
| 454 sim PE        | 7,367,318** | 76               | 0.715 <sup>b</sup> |
| Illumina diginorm | 9,639,354   | 83               | 1.2 <sup>b</sup>   |

\*all assemblies utilized digitally normalized illumina data. The properties of the original data are included here for reference.

\*\*refers to number of read pairs

<sup>a</sup>fastq file

<sup>b</sup>fasta file

**Tables S3-S18**

Available for download at <http://www.g3journal.org/lookup/suppl/doi:10.1534/g3.113.008516/-/DC1>.

**Table S3** Reciprocal best blastn hits between assembled contigs and 89 previously published *Tenebrio molitor* gene sequences from GenBank.

**Table S4** GenBank accession numbers and metadata for 20 previously published *Tenebrio molitor* gene sequences which do not retrieve a reciprocal best blastn hit from assembled contigs.

**Table S5** Reciprocal best blastp hits between predicted proteins derived from assembled contigs and the *Tribolium castaneum* predicted proteome official gene set (<http://beetlebase.org/>).

**Table S6** Details of annotated *Tenebrio molitor* contigs defined as immune genes.

**Table S7** Details of *Tribolium castaneum* immune genes for which no putative *Tenebrio molitor* ortholog could be identified.

**Table S8** Details of two putative defensins which were discarded due to poor read support.

**Table S9** Genes which were differentially expressed at one or more timepoints in the timecourse.

**Table S10** Details of cluster allocation for each differentially expressed gene.

**Table S11** Results of a hypergeometric test for over-representation of biological process gene ontology terms associated with the transiently-induced temporal profile.

**Table S12** Results of a hypergeometric test for over-representation of molecular function gene ontology terms associated with the transiently-induced temporal profile.

**Table S13** Results of a hypergeometric test for over-representation of biological process gene ontology terms associated with the long-lasting induction temporal profile.

**Table S14** Results of a hypergeometric test for over-representation of molecular function gene ontology terms associated with the long-lasting induction temporal profile.

**Table S15** Results of a hypergeometric test for over-representation of biological process gene ontology terms associated with the long-lasting repression temporal profile.

**Table S16** Results of a hypergeometric test for over-representation of molecular function gene ontology terms associated with the long-lasting repression temporal profile.

**Table S17** Primer sequences used to clone AMP sequences from cDNA.

**Table S18** Combined details of cluster allocation for each differentially-expressed gene together with annotations.
