# Supplementary material for: Inducible Defenses Stay Up Late: Temporal Patterns of Immune Gene Expression in Tenebrio molitor
Source: PubMed Central journal article supplement (PMC4065263; doi:10.1534/g3.113.008516), 2014-06-01
Supplement: supp_g3.113.008516_FigureS1.pdf [file supp_g3.113.008516_FigureS1.pdf]

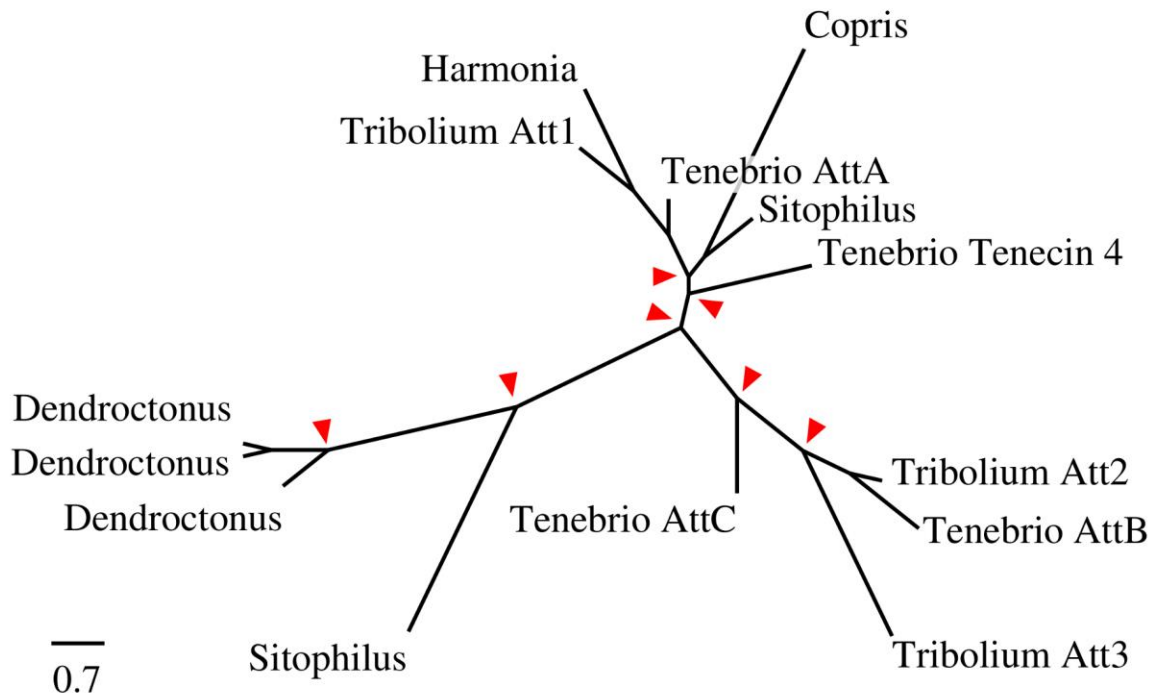

**Figure S1** Maximum likelihood phylogenetic tree showing relationships among beetle attacins. Protein sequences were aligned using MUSCLE and Gblocks. Trees were constructed using PhyML and TreeDyn using phylogeny.fr webserver. Red arrows indicate a confidence index > 0.8.
