# Supplementary material for: Inducible Defenses Stay Up Late: Temporal Patterns of Immune Gene Expression in Tenebrio molitor
Source: PubMed Central journal article supplement (PMC4065263; doi:10.1534/g3.113.008516), 2014-06-01
Supplement: supp_g3.113.008516_FigureS3.pdf [file supp_g3.113.008516_FigureS3.pdf]

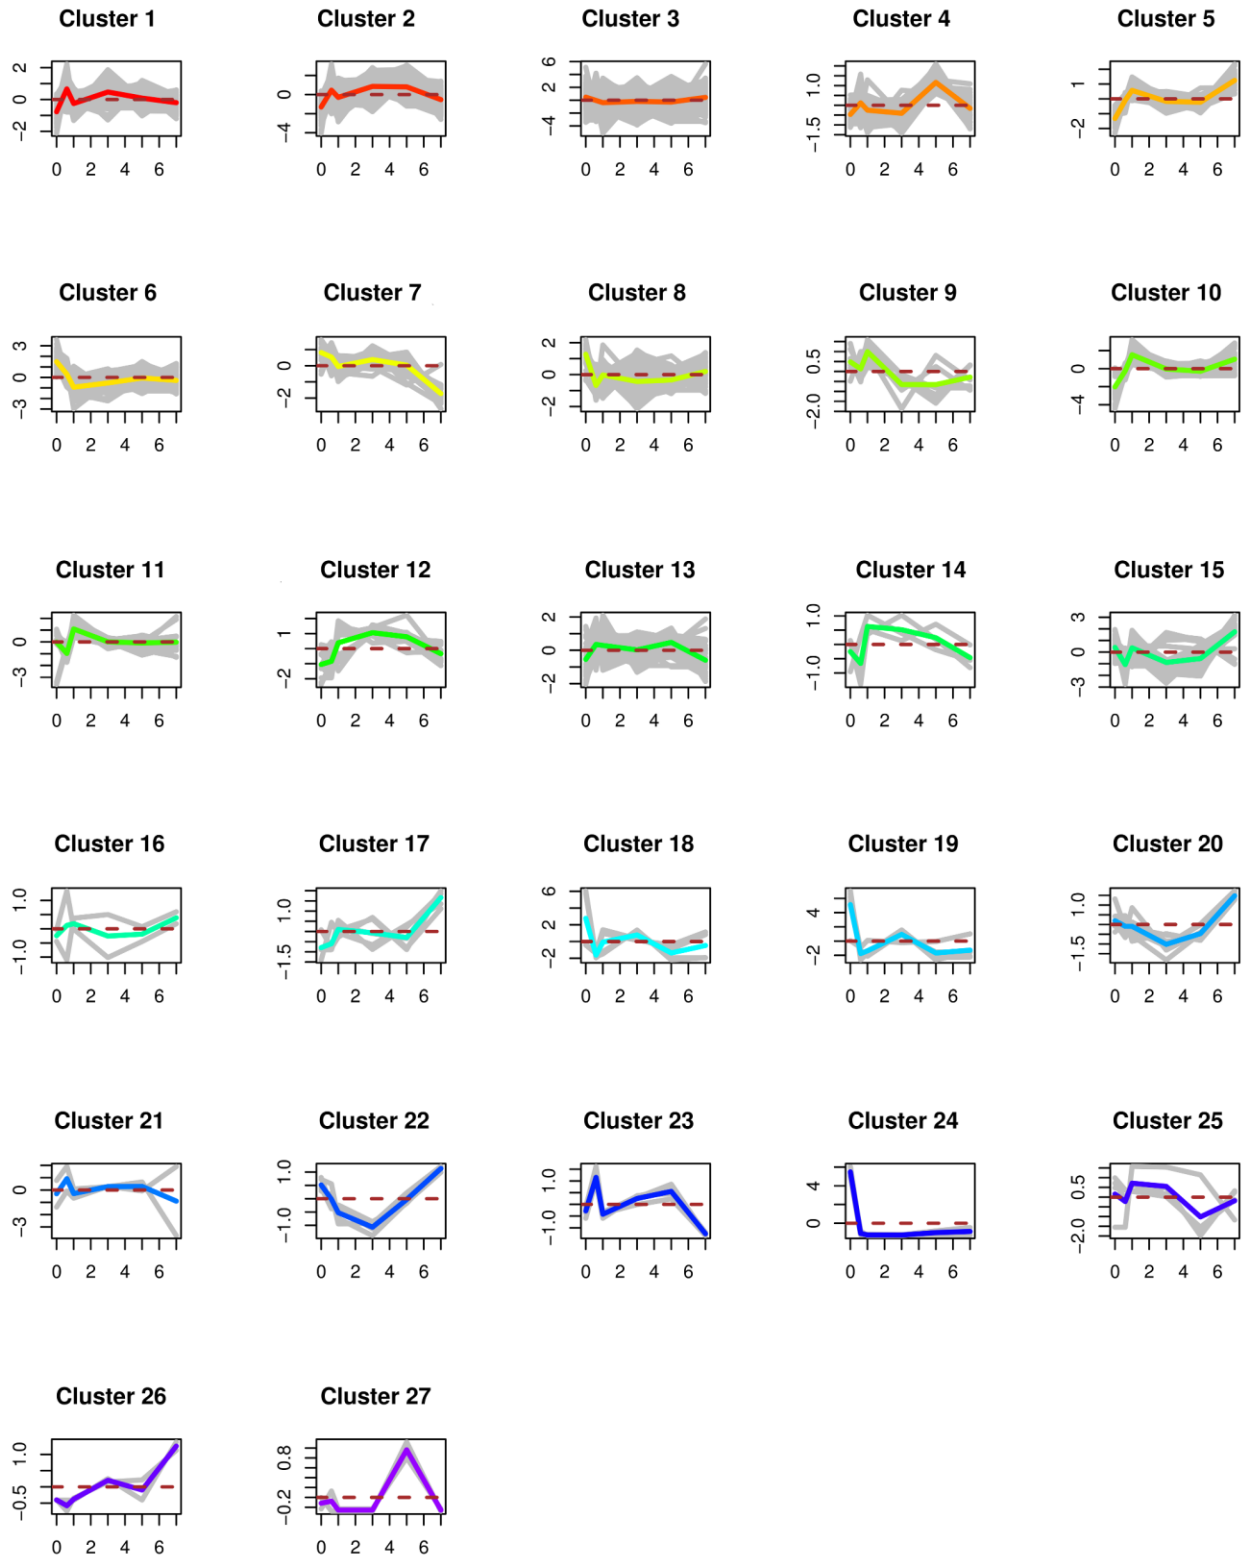

**Figure S3** Gene expression clusters produced by the R package DIRECT. Vertical axes represent median centered log<sub>2</sub> FPKM whereas horizontal axes represent days post immune challenge. Colored lines depict the median profile for each cluster.
