# Supplementary material for: Inducible Defenses Stay Up Late: Temporal Patterns of Immune Gene Expression in Tenebrio molitor
Source: PubMed Central journal article supplement (PMC4065263; doi:10.1534/g3.113.008516), 2014-06-01
Supplement: supp_g3.113.008516_TableS1.pdf [file supp_g3.113.008516_TableS1.pdf]

**Table S1 Comparison of trinity assemblies utilizing illumina and/or 454 reads.** sim PE, simulated paired-end; USCO, universal single-copy ortholog.

| Assembly                  | Components | Transcripts | N50  | N90 | Orthologs | USCOs |
|---------------------------|------------|-------------|------|-----|-----------|-------|
| Illumina                  | 44811      | 96330       | 2545 | 571 | 8955      | 3071  |
| 454 (newbler)*            | 16647*     | 22507       | 1567 | 559 | 7628      | 2907  |
| 454 sim PE                | 25649      | 58060       | 696  | 306 | 6557      | 2465  |
| Illumina + 454            | 45676      | 103597      | 2183 | 516 | 8830      | 2999  |
| Illumina + 454 sim PE     | 49410      | 122521      | 1745 | 448 | 9370      | 3120  |
| Illumina + 454 (newbler)* | 54099*     | 118322      | 742  | 168 | 9057      | 3107  |
| 454                       | 13724      | 25374       | 1097 | 434 | 6876      | 2646  |

\*assembly newbler included for reference. Newbler does not compute components and the number of isogroups is reported instead. Orthologs, the number of putative orthologs between the assembly and the *Tribolium castaneum* proteome. In each assembly Illumina data was first digitally normalized.
