# Supplementary material for: Inducible Defenses Stay Up Late: Temporal Patterns of Immune Gene Expression in Tenebrio molitor
Source: PubMed Central journal article supplement (PMC4065263; doi:10.1534/g3.113.008516), 2014-06-01
Supplement: supp_g3.113.008516_TableS2.pdf [file supp_g3.113.008516_TableS2.pdf]

**Table S2 Summary statistics for each of the data sets used in *de novo* assembly.** sim PE, simulated paired-end; diginorm, digitally normalized.

| Data set          | Reads       | Mean length (bp) | File size (GB)     |
|-------------------|-------------|------------------|--------------------|
| 454               | 1,151,456   | 285              | 0.695 <sup>a</sup> |
| Illumina*         | 95,339,034  | 101              | 22.8 <sup>a</sup>  |
| 454 sim PE        | 7,367,318** | 76               | 0.715 <sup>b</sup> |
| Illumina diginorm | 9,639,354   | 83               | 1.2 <sup>b</sup>   |

\*all assemblies utilized digitally normalized illumina data. The properties of the original data are included here for reference.

\*\*refers to number of read pairs

<sup>a</sup>fastq file

<sup>b</sup>fasta file
